# Supplementary material for: Linearversusbranched: flow of a wormlike micellar fluid past a falling sphere
Source: Royal Society of Chemistry journal article supplement (doi:10.1039/d1sm00281c), 2021-01-01
Supplement: d1sm00281c1.pdf [file d1sm00281c1.pdf]

**This file serves as a supplementary material for paper: Linear versus Branched:  
Flow of a Wormlike Micellar Fluid Past a Falling Sphere**

Shijian Wu and Hadi Mohammadigoushki\*

*Department of Chemical and Biomedical Engineering, FAMU-FSU College of Engineering,  
Florida State University, Tallahassee, 32310, United States*

(Dated: March 18, 2021)

---

\* Corresponding author; hadi.moham@eng.famu.fsu.edu

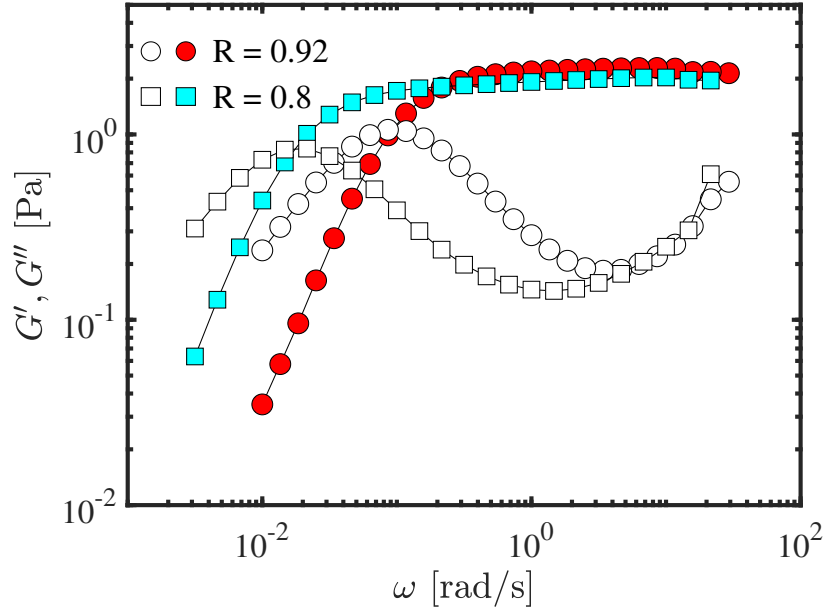

FIG. 1. Elastic modulus (filled symbols) and loss modulus (empty symbols) versus angular frequency the linear and branched micellar solutions of CPyCl/NaSal.

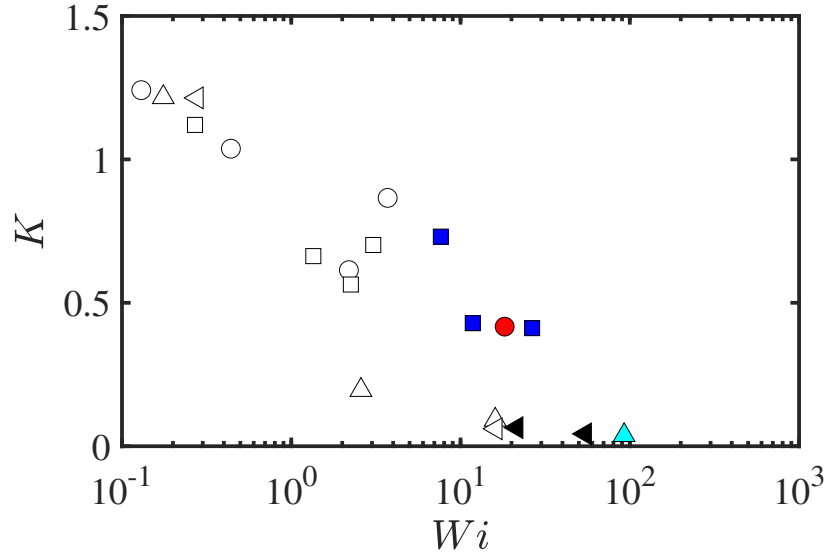

FIG. 2. Drag coefficient  $K$  as a function of Weissenberg number,  $Wi$  for linear and branched micellar solutions. Empty and filled symbols denote the steady and unsteady sphere sedimentation behavior. Each symbol corresponds to a fixed sphere to tube size ratio as follows:  $a/\mathcal{R} = 0.056$  (upper triangles),  $a/\mathcal{R} = 0.037$  (left triangles) for linear wormlike micelles and  $a/\mathcal{R} = 0.056$  (squares),  $a/\mathcal{R} = 0.037$  (circles) for branched wormlike micelles.

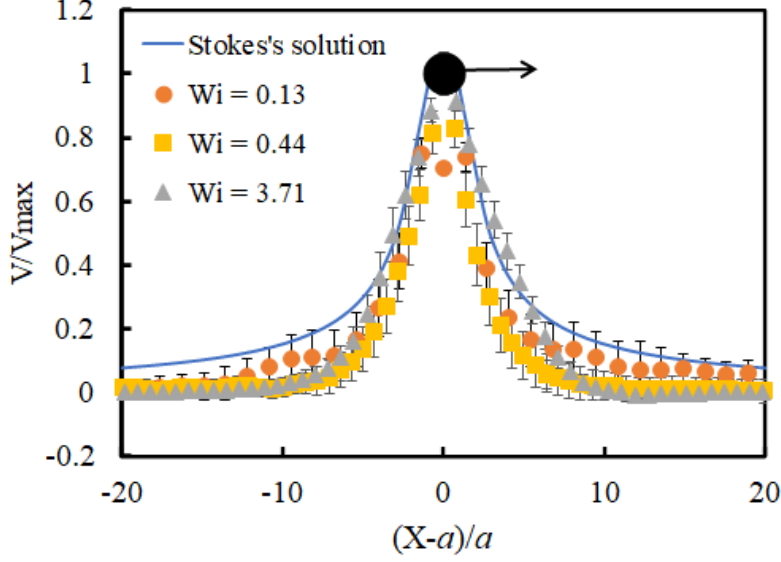

FIG. 3. Normalized fluid velocity as a function of distance along the axis of sphere center of mass for branched wormlike micellar solutions and the sphere to tube size ratio  $a/\mathcal{R} = 0.056$ .

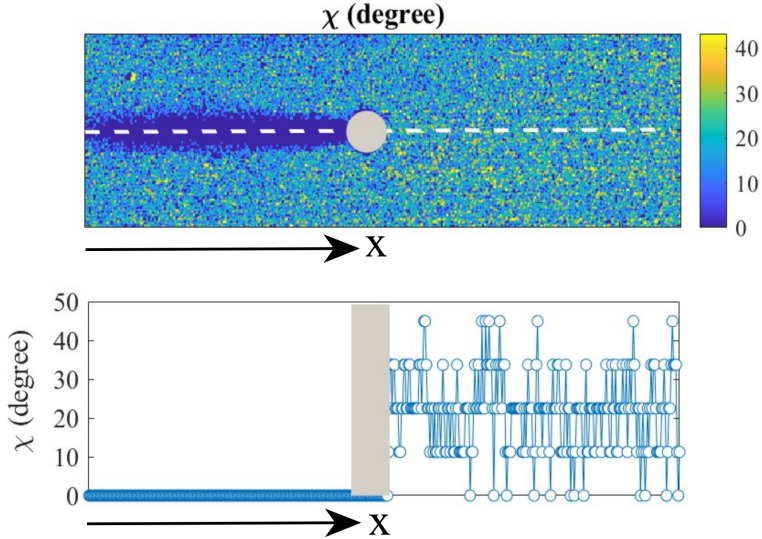

FIG. 4. Averaged extinction angle  $\bar{\chi}$  (false color) around the falling sphere (top panel) and the calculated extinction angle along the dashed line (bottom panel) in the branched micellar solution. Experimental conditions are as  $Wi = 5$  and  $Re = 5.4 \times 10^{-4}$  and the sphere to fluid column size ratio is  $a/\mathcal{R} = 0.028$ . Note that the discrete nature of the extinction angle data upstream of the sphere center of mass (in the bottom panel) is related to the spatial resolution of our images.
